# Supplementary material for: Gas-phase equilibrium molecular structures and ab initio thermochemistry of anthracene and rubrene
Source: Royal Society of Chemistry journal article supplement (doi:10.1039/d2cp04215k), 2022-01-01
Supplement: d2cp04215k1.pdf [file d2cp04215k1.pdf]

## Supporting Information for

### Gas-phase equilibrium molecular structures and *ab initio* thermochemistry of anthracene and rubrene

Arseniy A. Otlyotov,<sup>a</sup> Ivan Yu. Kurochkin,<sup>b</sup> Yury Minenkov,<sup>a,c</sup> Pia C. Trapp,<sup>d</sup> Jan-Hendrik Lamm,<sup>d</sup> Georgiy V. Girichev,<sup>b</sup> and Norbert W. Mitzel<sup>\*d</sup>

Table S1. Conditions of GED/MS experiments for anthracene

|                                                   |                     |                     |
|---------------------------------------------------|---------------------|---------------------|
| Nozzle-to-film distance, mm                       | 338                 | 598                 |
| Primary electron beam current, $\mu\text{A}$      | 1.72                | 0.86                |
| Accelerating voltage, kV                          | 90                  | 88                  |
| Temperature of effusion cell, $^{\circ}\text{C}$  | 122(5)              | 123(5)              |
| Wavelength of electrons, $\text{\AA}$             | 0.03926(4)          | 0.03979(3)          |
| Average exposure time, s                          | 83                  | 67                  |
| Residual gas pressure, Torr                       |                     |                     |
| • in diffraction chamber                          | $1.8 \cdot 10^{-6}$ | $3.1 \cdot 10^{-6}$ |
| • in mass-spectrometric block                     | $4.8 \cdot 10^{-7}$ | $5 \cdot 10^{-7}$   |
| Ionization voltage, V                             | 50                  | 50                  |
| Recorded films, substance/standard                | 6/2                 | 6/2                 |
| $s$ -range/ $\Delta s$ , $\text{\AA}^{-1}$        | 3.1-30.2/0.1        | 1.3-16.9/0.1        |
| Inflection points for background <sup>a</sup>     | 2                   | 2                   |
| Experimental weighted $R$ -factor, % <sup>b</sup> | 4.99                | 2.65                |
| Experimental $R$ -factor, %                       | 12.20               | 5.59                |

<sup>a</sup> For reduced intensities of anthracene.

<sup>b</sup> Calculated as  $[\sum_i^N \sum_j^M \omega_j (s_j M_i(s_j) - s_j M_{\text{av}}(s_j))^2 / N \sum_j^M \omega_j (s_j M_{\text{av}}(s_j))^2]^{1/2} \times 100\%$ , where  $s_j M_i(s_j)$  is the experimental molecular intensity from set  $i$  in point  $s_j$ ,  $s_j M_{\text{av}}(s_j)$  is the average molecular intensity curve in the point  $s_j$ ,  $\omega_j$  is the weight of the averaged  $sM(s)$  calculated from the respective standard deviation as  $1/\sigma^2$ ,  $N$  is the number of data sets,  $M$  is the number of points in each set.

<sup>c</sup> Calculated with all  $\omega_j = 1$ .

Table S2. Conditions of GED/MS experiments for rubrene

|                                                   |                     |                     |
|---------------------------------------------------|---------------------|---------------------|
| Nozzle-to-film distance, mm                       | 338                 | 598                 |
| Primary electron beam current, $\mu\text{A}$      | 1.71                | 0.44                |
| Accelerating voltage, kV                          | 74                  | 73                  |
| Temperature of effusion cell, $^{\circ}\text{C}$  | 228(5)              | 225(5)              |
| Wavelength of electrons, $\text{\AA}$             | 0.04364(4)          | 0.04380(3)          |
| Average exposure time, s                          | 140                 | 61                  |
| Residual gas pressure, Torr                       |                     |                     |
| • in diffraction chamber                          | $1.9 \cdot 10^{-6}$ | $2.1 \cdot 10^{-6}$ |
| • in mass-spectrometric block                     | $8.7 \cdot 10^{-7}$ | $8.0 \cdot 10^{-7}$ |
| Ionization voltage, V                             | 50                  | 50                  |
| Recorded films, substance/standard                | 6/2                 | 6/2                 |
| $s$ -range/ $\Delta s$ , $\text{\AA}^{-1}$        | 3.0-27.1/0.1        | 1.2-15.4/0.1        |
| Inflection points for background <sup>a</sup>     | 4                   | 3                   |
| Experimental weighted $R$ -factor, % <sup>b</sup> | 5.35                | 3.17                |
| Experimental $R$ -factor, % <sup>c</sup>          | 10.14               | 4.26                |

<sup>a</sup> For reduced intensities of rubrene.

<sup>b,c</sup> See notes in Table S1.

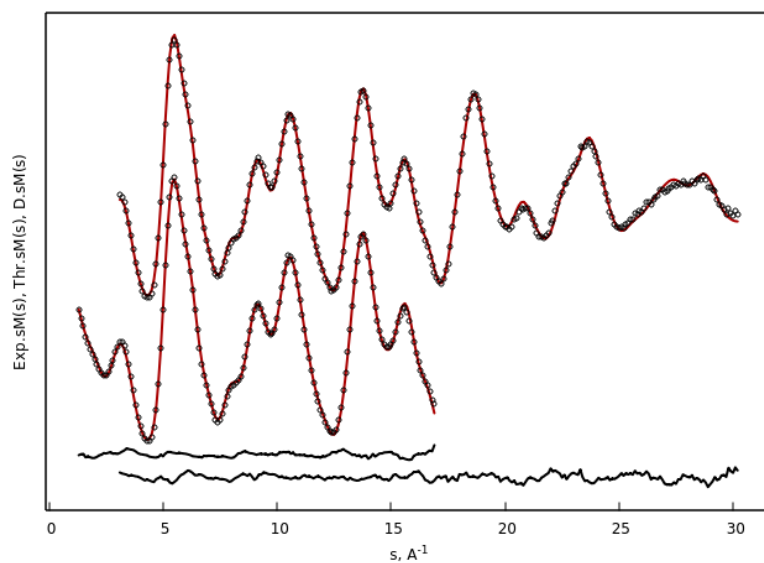

Figure S1. Experimental (dots) and corresponding model (lines) molecular intensity functions  $sM(s)$  for anthracene.

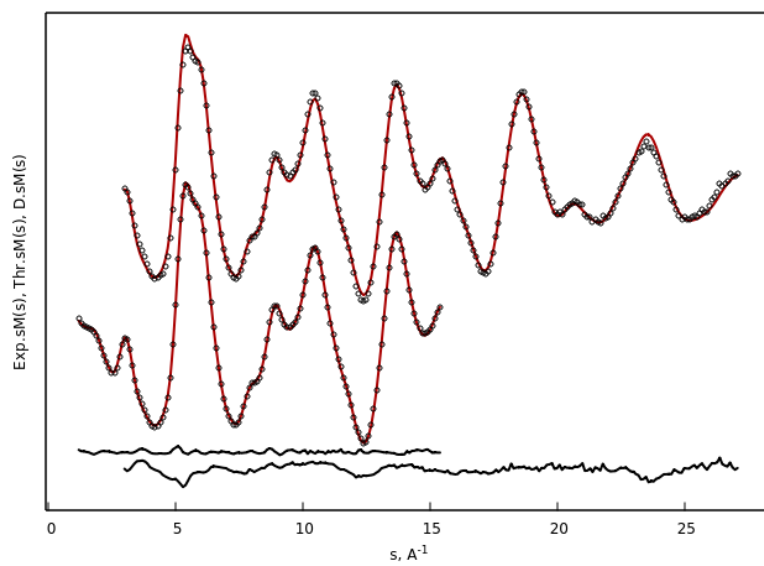

Figure S2. Experimental (dots) and corresponding model (lines) molecular intensity functions  $sM(s)$  for rubrene.

Table S3. Mass spectra of anthracene vapor recorded simultaneously with electron diffraction measurements.<sup>a</sup>

| Ion                              | $m/e$ | $I, \%$ |     |
|----------------------------------|-------|---------|-----|
|                                  |       | LD      | SD  |
| $[\text{C}_{14}\text{H}_{10}]^+$ | 178   | 100     | 100 |
| $[\text{C}_{12}\text{H}_8]^+$    | 152   | 9       | 8   |
| $[\text{C}_7\text{H}_5]^+$       | 89    | 29      | 24  |
| $[\text{C}_6\text{H}_3]^+$       | 75    | 25      | 25  |
| $[\text{C}_5\text{H}_3]^+$       | 63    | 8       | 8   |
| $[\text{C}_4\text{H}_3]^+$       | 51    | 3       | 3   |

<sup>a</sup> The following atomic weights (amu) were used in the interpretation of the mass spectra: C,12; H, 1; the ion intensities below 1% are omitted.

Table S4. Mass spectra of rubrene vapor recorded simultaneously with electron diffraction measurements.<sup>a</sup>

| Ion                                 | $m/e$ | $I, \%$ |     |
|-------------------------------------|-------|---------|-----|
|                                     |       | LD      | SD  |
| $[\text{C}_{42}\text{H}_{28}]^+$    | 532   | 100     | 100 |
| $[\text{C}_{36}\text{H}_{23}]^+$    | 455   | 36      | 35  |
| $[\text{C}_{35}\text{H}_{19}]^+$    | 439   | 4       | 4   |
| $[\text{C}_{34}\text{H}_{16}]^+$    | 424   | 3       | 3   |
| $[\text{C}_{33}\text{H}_{16}]^+$    | 412   | 1       | 2   |
| $[\text{C}_{30}\text{H}_{18}]^+$    | 378   | 45      | 44  |
| $[\text{C}_{42}\text{H}_{28}]^{++}$ | 266   | 2       | 2   |
| $[\text{C}_{36}\text{H}_{23}]^{++}$ | 228   | 10      | 10  |
| $[\text{C}_{35}\text{H}_{19}]^{++}$ | 220   | 8       | 9   |
| $[\text{C}_{34}\text{H}_{16}]^{++}$ | 212   | 5       | 5   |
| $[\text{C}_{33}\text{H}_{13}]^{++}$ | 205   | 2       | 2   |
| $[\text{C}_{30}\text{H}_{18}]^{++}$ | 189   | 14      | 14  |

<sup>a</sup> The following atomic weights (amu) were used in the interpretation of the mass spectra: C,12; H, 1; the ion intensities below 1% are omitted.

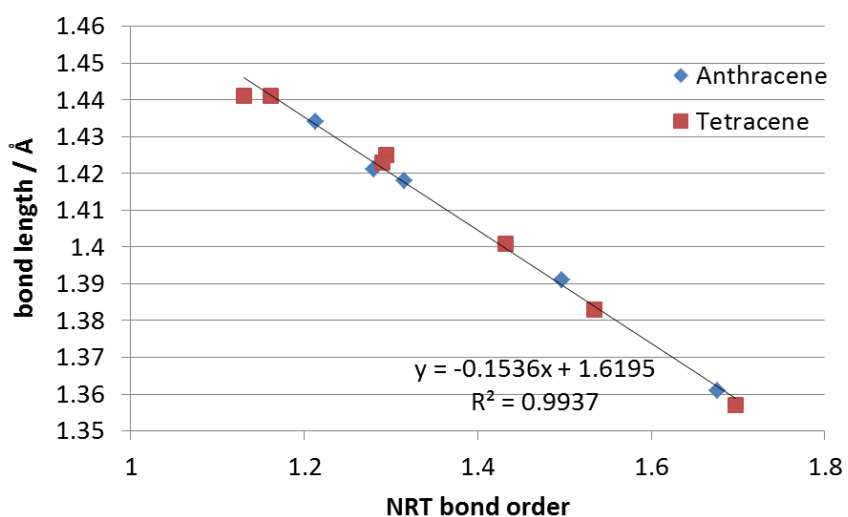

Figure S3. Correlation between NRT bond orders and corresponding bond lengths for the structures optimized at PBE0-D3(BJ)/def2-TZVP level of theory.

Table S5. Selected molecular parameters of tetracene and rubrene optimized at PBE0-D3(BJ)/def2-TZVP level of theory. <sup>a</sup>

| Parameter                   | Tetracene | Rubrene |
|-----------------------------|-----------|---------|
| $r(\text{C4a-C5})$          | 1.383     | 1.394   |
| $r(\text{C5-C5a})$          | 1.401     | 1.419   |
| $\angle(\text{C4a-C5-C5a})$ | 121.8     | 120.0   |

<sup>a</sup> Bond lengths are given in Å, bond angle in degrees.

Table S6. Reference gas-phase enthalpies of formation used in this work.

| Molecule                                              | $\Delta_f H_m^\circ$ (g, 298.15 K) |
|-------------------------------------------------------|------------------------------------|
| CH <sub>4</sub> (methane)                             | -74.526±0.049 <sup>a</sup>         |
| C <sub>2</sub> H <sub>6</sub> (ethane)                | -84.04±0.13 <sup>a</sup>           |
| C <sub>2</sub> H <sub>4</sub> (ethylene)              | 52.32±0.12 <sup>a</sup>            |
| C <sub>6</sub> H <sub>6</sub> (benzene)               | 83.12±0.22 <sup>a</sup>            |
| C <sub>8</sub> H <sub>10</sub> (ethylbenzene)         | 29.73±0.55 <sup>a</sup>            |
| C <sub>8</sub> H <sub>8</sub> (phenylethene)          | 148.34±0.55 <sup>a</sup>           |
| C <sub>4</sub> H <sub>6</sub> (1,3-butadiene)         | 110.90±0.33 <sup>a</sup>           |
| C <sub>6</sub> H <sub>12</sub> (cyclohexane)          | -122.94±0.30 <sup>a</sup>          |
| C <sub>4</sub> H <sub>8</sub> (isobutene)             | -17.01±0.39 <sup>a</sup>           |
| C <sub>5</sub> H <sub>12</sub> ( <i>neo</i> -pentane) | -167.39±0.39 <sup>a</sup>          |
| C <sub>5</sub> H <sub>6</sub> (cyclopentadiene)       | 134.15±0.63 <sup>a</sup>           |
| C <sub>4</sub> H <sub>10</sub> ( <i>iso</i> -butane)  | -134.62±0.30 <sup>a</sup>          |
| C <sub>7</sub> H <sub>8</sub> (toluene)               | 50.11±0.33 <sup>a</sup>            |
| C <sub>10</sub> H <sub>8</sub> (naphthalene)          | 149.0±0.4 <sup>a,b</sup>           |
| C <sub>16</sub> H <sub>10</sub> (pyrene)              | 224.7±2.9 <sup>a,b</sup>           |

<sup>a</sup> Retrieved from the ATcT database. <sup>b</sup> Obtained from the reaction-based Feller-Peterson-Dixon approach and the ATcT reference values, see Section 3.1 of ref. <sup>1</sup>

- 1 I. Minenkova, A. A. Otlyotov, L. Cavallo and Y. Minenkov, Gas-phase thermochemistry of polycyclic aromatic hydrocarbons: An approach integrating the quantum chemistry composite scheme and reaction generator, *Phys. Chem. Chem. Phys.*, 2022, **24**, 3163–3181.
